# Supplementary material for: Photosynthetic Pigments with Potential for a Photosynthetic Antenna: A DFT Analysis
Source: Hindawi journal article supplement (doi:10.1155/2019/7432848), 2019-04-02
Supplement: f1 [file 7432848.f1.pdf]

## Supplementary material

**Table 1.** CHLA Cartesian coordinates.

| Atom             | X         | Y         | Z         |
|------------------|-----------|-----------|-----------|
| Mg               | -1.337762 | 0.130805  | 0.025296  |
| N01              | -2.132623 | 1.981596  | 0.222357  |
| N02              | -3.192730 | -0.684805 | -0.374306 |
| N03              | -0.586928 | -1.727303 | -0.158513 |
| N04              | 0.627654  | 0.886148  | 0.410663  |
| O01              | 3.124581  | -4.543803 | -0.244677 |
| O02              | 4.840149  | -1.522846 | 1.708214  |
| O03              | 3.139917  | -2.788308 | 2.464918  |
| O04              | 6.067976  | 1.113986  | -2.444252 |
| O05              | 6.294520  | 3.330318  | -2.125925 |
| C01              | -1.463802 | 3.125076  | 0.524083  |
| C02              | -2.382971 | 4.241667  | 0.578149  |
| C03              | -3.632879 | 3.732736  | 0.291584  |
| C04              | -3.460141 | 2.303528  | 0.079625  |
| C05              | -4.468086 | 1.400875  | -0.230230 |
| C06              | -4.358495 | 0.012689  | -0.437091 |
| C07              | -5.457786 | -0.874333 | -0.742893 |
| C08              | -4.919597 | -2.134070 | -0.864166 |
| C09              | -3.497567 | -1.998664 | -0.630098 |
| C10              | -2.565783 | -3.043461 | -0.670209 |
| C11              | -1.190583 | -2.940377 | -0.455949 |
| C12              | -0.199064 | -3.991688 | -0.515314 |
| C13              | 1.005749  | -3.357733 | -0.244890 |
| C13 <sup>1</sup> | 2.445459  | -3.544846 | -0.120997 |
| C13 <sup>2</sup> | 3.044189  | -2.123931 | 0.199720  |
| C14              | 0.713531  | -1.986792 | -0.038253 |
| C15              | 1.842966  | -1.181028 | 0.210927  |
| C16              | 1.804384  | 0.182987  | 0.406829  |
| C17              | 2.992806  | 1.101564  | 0.600438  |
| C18              | 2.323196  | 2.409338  | 1.071444  |
| C19              | 0.862827  | 2.183504  | 0.716759  |
| C20              | -0.078984 | 3.200750  | 0.759758  |
| C21              | -2.018012 | 5.643322  | 0.930991  |
| C22              | -4.913335 | 4.418628  | 0.239377  |
| C23              | -5.119916 | 5.701047  | -0.089084 |
| C24              | -6.885169 | -0.459542 | -0.883147 |
| C25              | -5.635979 | -3.419785 | -1.135623 |
| C26              | -5.976281 | -4.199906 | 0.139457  |
| C27              | -0.435051 | -5.433866 | -0.807993 |
| C28              | 3.796384  | -2.107663 | 1.515259  |
| C29              | 3.771376  | -2.808053 | 3.746114  |
| C30              | 3.789379  | 1.263600  | -0.704627 |

|                        |           |           |           |
|------------------------|-----------|-----------|-----------|
| C31                    | 5.108822  | 2.007002  | -0.482354 |
| C32                    | 5.880750  | 2.255753  | -1.754619 |
| C33                    | 6.803000  | 1.257114  | -3.660360 |
| C34                    | 2.495671  | 2.666062  | 2.571086  |
| H29(C10)               | -2.952832 | -4.032927 | -0.898105 |
| H31(C05)               | -5.468048 | 1.812626  | -0.328360 |
| H43(C22)               | -5.784441 | 3.814128  | 0.491085  |
| H44(C21)               | -2.867206 | 6.159354  | 1.390431  |
| H45(C21)               | -1.719683 | 6.227943  | 0.050692  |
| H46(C21)               | -1.182365 | 5.674928  | 1.637585  |
| H47(C30)               | 3.170351  | 1.795299  | -1.439611 |
| H48(C30)               | 4.010508  | 0.282016  | -1.132634 |
| H49(C27)               | -0.910181 | -5.574274 | -1.786393 |
| H50(C27)               | -1.093677 | -5.893499 | -0.060926 |
| H51(C27)               | 0.511448  | -5.978881 | -0.807192 |
| H52(C24)               | -7.300486 | -0.104125 | 0.068322  |
| H53(C25)               | -5.029419 | -4.051544 | -1.796915 |
| H54(C25)               | -6.559844 | -3.213917 | -1.689110 |
| H55(C23)               | -4.315030 | 6.359916  | -0.398776 |
| H56(C23)               | -6.120380 | 6.122677  | -0.083360 |
| H57(C26)               | -6.625569 | -3.610499 | 0.794846  |
| H58(C26)               | -5.070942 | -4.442812 | 0.705352  |
| H59(C26)               | -6.491601 | -5.136621 | -0.099218 |
| H60(C31)               | 5.738680  | 1.409536  | 0.189666  |
| H61(C31)               | 4.952115  | 2.983216  | -0.015531 |
| H62(C17)               | 3.670104  | 0.700050  | 1.363480  |
| H63(C18)               | 2.714406  | 3.273429  | 0.519988  |
| H64(C34)               | 3.554002  | 2.801613  | 2.819254  |
| H65(C34)               | 2.115351  | 1.820944  | 3.155574  |
| H66(C34)               | 1.952872  | 3.562792  | 2.886674  |
| H68(C20)               | 0.309190  | 4.185006  | 1.004988  |
| H69(C13 <sup>2</sup> ) | 3.778133  | -1.875755 | -0.574321 |
| H73(C29)               | 4.766584  | -3.252763 | 3.674024  |
| H74(C29)               | 3.863077  | -1.794331 | 4.144407  |
| H75(C29)               | 3.125410  | -3.412939 | 4.381566  |
| H78(C33)               | 7.804690  | 1.645434  | -3.459903 |
| H79(C33)               | 6.859018  | 0.257186  | -4.090054 |
| H80(C33)               | 6.290508  | 1.940840  | -4.341705 |
| H81(C24)               | -7.001433 | 0.353915  | -1.609340 |
| H82(C24)               | -7.510953 | -1.290875 | -1.219900 |

## Supplementary material

**Table 2.** CHLB Cartesian coordinates.

| Atom             | X         | Y         | Z         |
|------------------|-----------|-----------|-----------|
| Mg               | -1.185183 | 0.190978  | 0.058016  |
| N01              | -1.920071 | 2.062628  | 0.258255  |
| N02              | -3.076964 | -0.570088 | -0.319087 |
| N03              | -1.490386 | -0.687733 | 0.124630  |
| N04              | 0.805596  | 0.891304  | 0.416001  |
| O01              | -7.665206 | -1.060693 | -0.977631 |
| O02              | 3.136504  | -4.612086 | -0.232136 |
| O03              | 3.229325  | -2.854507 | 2.465787  |
| O04              | 4.947616  | -1.620041 | 1.697592  |
| O05              | 6.520419  | 3.145848  | -2.200691 |
| O06              | 6.210449  | 0.937536  | -2.505881 |
| C01              | -1.216276 | 3.186854  | 0.546113  |
| C02              | -2.103911 | 4.331883  | 0.609265  |
| C03              | -3.369502 | 3.859147  | 0.342287  |
| C04              | -3.240713 | 2.422048  | 0.132276  |
| C05              | -4.279198 | 1.555616  | -0.159958 |
| C06              | -4.217760 | 0.158122  | -0.367707 |
| C07              | -5.338042 | -0.709705 | -0.651552 |
| C08              | -4.829084 | -1.997512 | -0.782105 |
| C09              | -3.415188 | -1.884926 | -0.567869 |
| C10              | -2.505814 | -2.955286 | -0.608337 |
| C11              | -1.131929 | -2.887078 | -0.407147 |
| C12              | -0.168724 | -3.967990 | -0.468345 |
| C13              | 1.053251  | -3.365555 | -0.215482 |
| C13 <sup>1</sup> | 2.489932  | -3.593119 | -0.105687 |
| C13 <sup>2</sup> | 3.131629  | -2.189141 | 0.201355  |
| C14              | 0.801725  | -1.984054 | -0.015820 |
| C15              | 1.958799  | -1.210953 | 0.216517  |
| C16              | 1.962585  | 0.153893  | 0.402964  |
| C17              | 3.179080  | 1.038110  | 0.576682  |
| C18              | 2.553786  | 2.368146  | 1.045316  |
| C19              | 1.083454  | 2.181654  | 0.712115  |
| C20              | 0.171947  | 3.226839  | 0.762716  |
| C21              | -1.691540 | 5.722358  | 0.952706  |
| C22              | -4.630750 | 4.581718  | 0.306543  |
| C23              | -4.802440 | 5.860993  | -0.051334 |
| C24              | -6.724862 | -0.302298 | -0.797261 |
| C25              | -5.594677 | -3.250119 | -1.056700 |
| C26              | -6.229302 | -3.838708 | 0.209069  |
| C27              | -0.448518 | -5.404355 | -0.747620 |
| C28              | 3.892649  | -2.186617 | 1.512767  |
| C29              | 3.867683  | -2.887332 | 3.744104  |

|                        |           |           |           |
|------------------------|-----------|-----------|-----------|
| C30                    | 3.965206  | 1.166866  | -0.738613 |
| C31                    | 5.307651  | 1.873687  | -0.537308 |
| C32                    | 6.072797  | 2.088401  | -1.820252 |
| C34                    | 2.753930  | 2.633235  | 2.540233  |
| H29(C10)               | -2.922459 | -3.935159 | -0.822595 |
| H31(C05)               | -5.262547 | 2.006014  | -0.243095 |
| H43(C22)               | -5.513282 | 4.012418  | 0.597027  |
| H44(C21)               | -2.526734 | 6.273909  | 1.395655  |
| H45(C21)               | -1.360408 | 6.285165  | 0.070117  |
| H46(C21)               | -0.864082 | 5.729815  | 1.669629  |
| H47(C30)               | 3.353382  | 1.710040  | -1.471225 |
| H48(C30)               | 4.153224  | 0.176001  | -1.160902 |
| H49(C27)               | -0.938678 | -5.536963 | -1.719492 |
| H50(C27)               | -1.112067 | -5.838289 | 0.010156  |
| H51(C27)               | 0.481805  | -5.976258 | -0.753066 |
| H52(C24)               | -6.912538 | 0.791536  | -0.740441 |
| H53(C25)               | -4.938411 | -3.994706 | -1.522546 |
| H54(C25)               | -6.392239 | -3.024606 | -1.770491 |
| H55(C23)               | -3.983609 | 6.482412  | -0.399846 |
| H56(C23)               | -5.787478 | 6.316896  | -0.032333 |
| H57(C26)               | -6.948387 | -3.132014 | 0.631142  |
| H58(C26)               | -5.472066 | -4.061728 | 0.968140  |
| H59(C26)               | -6.762177 | -4.765569 | -0.027316 |
| H60(C31)               | 5.927739  | 1.264815  | 0.133569  |
| H61(C31)               | 5.184870  | 2.858388  | -0.078183 |
| H62(C17)               | 3.852219  | 0.621182  | 1.334964  |
| H63(C18)               | 2.960881  | 3.216149  | 0.480672  |
| H64(C34)               | 3.819074  | 2.740512  | 2.771774  |
| H65(C34)               | 2.358229  | 1.804716  | 3.138029  |
| H66(C34)               | 2.242080  | 3.548163  | 2.855039  |
| H68(C20)               | 0.590445  | 4.200843  | 0.997918  |
| H69(C13 <sup>2</sup> ) | 3.866646  | -1.966758 | -0.579350 |
| H73(C29)               | 4.853731  | -3.350699 | 3.665512  |
| H74(C29)               | 3.980321  | -1.875764 | 4.142253  |
| H75(C29)               | 3.213911  | -3.480607 | 4.382337  |
| H78(C33)               | 6.937346  | 1.047836  | -3.730775 |
| H79(C33)               | 7.954654  | 1.399760  | -3.542511 |
| H80(C33)               | 6.951806  | 0.044560  | -4.155930 |
| H81(C24)               | 6.442957  | 1.746903  | -4.409833 |

**Table 3.** BCRY Cartesian coordinates.

| Atom | X          | Y         | Z         |
|------|------------|-----------|-----------|
| O01  | -14.746335 | -2.254986 | -0.577559 |

## Supplementary material

|          |            |           |           |           |            |           |           |
|----------|------------|-----------|-----------|-----------|------------|-----------|-----------|
| C01      | -12.296896 | 0.660895  | -0.680431 | H46(C02)  | -12.913816 | -0.949280 | -1.998138 |
| C01'     | 13.100445  | -0.549387 | 0.709982  | H47(C08)  | -8.531224  | -0.671439 | -0.021093 |
| C02      | -13.337423 | -0.355472 | -1.176910 | H48(C10)  | -6.309997  | -0.447652 | 0.001824  |
| C02'     | 14.141624  | 0.460774  | 1.218524  | H49(C19)  | -8.297039  | 3.161739  | 0.117258  |
| C03      | -13.789275 | -1.321596 | -0.097927 | H50(C19)  | -6.787638  | 3.135031  | 1.033197  |
| C03'     | 14.602990  | 1.423526  | 0.137984  | H51(C19)  | -8.307586  | 2.683107  | 1.813059  |
| C04      | -12.597195 | -2.118715 | 0.387482  | H52(C11)  | -4.978815  | 2.251091  | 0.735047  |
| C04'     | 13.415156  | 2.226205  | -0.372638 | H53(C12)  | -3.939435  | -0.521310 | -0.064209 |
| C05      | -11.367563 | -1.285855 | 0.655056  | H54(C14)  | -1.724538  | -0.803604 | -0.185427 |
| C05'     | 12.176358  | 1.401279  | -0.627441 | H55(C20)  | -2.864354  | 3.158887  | 0.038660  |
| C06      | -11.205626 | -0.038923 | 0.147740  | H56(C20)  | -2.836365  | 2.679483  | 1.735109  |
| C06'     | 12.011290  | 0.155501  | -0.117847 | H57(C20)  | -1.326671  | 2.794469  | 0.826549  |
| C07      | -10.005408 | 0.773098  | 0.375249  | H58(C15)  | 0.218753   | 1.528085  | 0.437266  |
| C07'     | 10.807230  | -0.651625 | -0.343469 | H59(C15') | 0.582734   | -1.395688 | -0.395887 |
| C08      | -8.721284  | 0.360816  | 0.269782  | H60(C14') | 2.526950   | 0.935361  | 0.226207  |
| C08'     | 9.524073   | -0.236896 | -0.235771 | H61(C12') | 4.742175   | 0.651671  | 0.103699  |
| C09      | -7.544317  | 1.178164  | 0.478172  | H62(C20') | 3.664684   | -3.027675 | 0.002111  |
| C09'     | 8.345291   | -1.052262 | -0.442203 | H63(C20') | 3.635762   | -2.548587 | -1.694373 |
| C10      | -6.318267  | 0.603039  | 0.295841  | H64(C20') | 2.126625   | -2.662711 | -0.784763 |
| C10'     | 7.120258   | -0.475285 | -0.258490 | H65(C11') | 5.778532   | -2.121686 | -0.695968 |
| C11      | -5.030293  | 1.205404  | 0.442075  | H66(C10') | 7.113822   | 0.575481  | 0.035294  |
| C11'     | 5.831378   | -1.075993 | -0.403203 | H67(C08') | 9.336049   | 0.795575  | 0.055619  |
| C12      | -3.867908  | 0.526657  | 0.230179  | H68(C19') | 9.095873   | -3.036538 | -0.081983 |
| C12'     | 4.669705   | -0.396283 | -0.190470 | H69(C19') | 7.584535   | -3.008415 | -0.994807 |
| C13      | -2.537468  | 1.055158  | 0.355101  | H70(C19') | 9.103574   | -2.558845 | -1.777929 |
| C13'     | 3.338797   | -0.923908 | -0.314465 | H71(C07') | 10.981867  | -1.706476 | -0.556809 |
| C14      | -1.479392  | 0.220589  | 0.099564  | H72(C04') | 13.162694  | 3.018064  | 0.352128  |
| C14'     | 2.281238   | -0.088741 | -0.058579 | H73(C04') | 13.684472  | 2.759640  | -1.294477 |
| C15      | -0.089441  | 0.521655  | 0.158639  | H74(C02') | 13.698523  | 1.039508  | 2.041705  |
| C15'     | 0.891186   | -0.389310 | -0.117300 | H75(C02') | 14.990783  | -0.089180 | 1.645428  |
| C16      | -11.681932 | 1.333403  | -1.918060 | H76(C03') | 15.378774  | 2.095720  | 0.523381  |
| C16'     | 12.479805  | -1.230162 | 1.940141  | H77(C03') | 15.057086  | 0.868587  | -0.692568 |
| C17      | -12.984509 | 1.742983  | 0.173279  | H78(C18)  | -9.834789  | -2.771728 | 0.999399  |
| C17'     | 13.791023  | -1.623836 | -0.149235 | H79(C18)  | -9.618472  | -1.291718 | 1.944184  |
| C18      | -10.366588 | -1.975713 | 1.539627  | H80(C18)  | -10.880230 | -2.465696 | 2.376413  |
| C18'     | 11.170302  | 2.096717  | -1.502526 | H81(C18') | 11.678834  | 2.592466  | -2.339341 |
| C19      | -7.733102  | 2.612184  | 0.881489  | H82(C18') | 10.639701  | 2.888755  | -0.954994 |
| C19'     | 8.531012   | -2.486763 | -0.845304 | H83(C18') | 10.420181  | 1.415536  | -1.908311 |
| C20      | -2.372920  | 2.493251  | 0.758652  | H84(C16)  | -10.987351 | 2.134840  | -1.647285 |
| C20'     | 3.173056   | -2.361979 | -0.717659 | H85(C16)  | -12.472181 | 1.770892  | -2.540366 |
| H42(C07) | -10.183022 | 1.827400  | 0.588545  | H86(C16)  | -11.131744 | 0.607712  | -2.526580 |
| H43(C04) | -12.871200 | -2.681014 | 1.289032  | H87(C17)  | -13.742995 | 2.269787  | -0.418955 |
| H44(C04) | -12.370125 | -2.879989 | -0.375619 | H88(C17)  | -13.473204 | 1.316450  | 1.054781  |
| H45(C02) | -14.199702 | 0.188722  | -1.590641 | H89(C17)  | -12.268499 | 2.493374  | 0.525376  |

## Supplementary material

|           |            |           |           |
|-----------|------------|-----------|-----------|
| H90(C17') | 13.075337  | -2.362657 | -0.525998 |
| H91(C17') | 14.536692  | -2.165403 | 0.445916  |
| H92(C17') | 14.296768  | -1.185995 | -1.015457 |
| H93(C16') | 13.268750  | -1.667730 | 2.564181  |
| H94(C16') | 11.924655  | -0.508991 | 2.549946  |
| H95(C16') | 11.788626  | -2.032930 | 1.664623  |
| H96(C03)  | -14.210039 | -0.758624 | 0.751226  |
| H97(O01)  | -15.514562 | -1.751551 | -0.882472 |

**Table 4.** ZEA Cartesian coordinates.

| Atom | X          | Y         | Z         |
|------|------------|-----------|-----------|
| O01  | -15.231274 | -2.130375 | 0.314398  |
| O02  | 15.176173  | 2.227323  | 0.208276  |
| C01  | -12.662823 | 0.529758  | 0.969481  |
| C01' | 12.663602  | -0.534427 | 0.965400  |
| C02  | -13.720715 | -0.554665 | 1.225699  |
| C02' | 13.713139  | 0.558717  | 1.221847  |
| C03  | -14.212525 | -1.209059 | -0.044780 |
| C03' | 14.211993  | 1.217165  | -0.050695 |
| C04  | -13.042856 | -1.892602 | -0.734384 |
| C04' | 13.049406  | 1.884093  | -0.754744 |
| C05  | -11.804902 | -1.033858 | -0.836812 |
| C05' | 11.809845  | 1.027884  | -0.842253 |
| C06  | -11.608355 | 0.046211  | -0.041272 |
| C06' | 11.608909  | -0.049561 | -0.044049 |
| C07  | -10.399760 | 0.875598  | -0.097365 |
| C07' | 10.398576  | -0.876493 | -0.096192 |
| C08  | -9.121140  | 0.435643  | -0.138011 |
| C08' | 9.120326   | -0.435433 | -0.137189 |
| C09  | -7.935777  | 1.266950  | -0.164873 |
| C09' | 7.934259   | -1.265759 | -0.162640 |
| C10  | -6.715539  | 0.651956  | -0.168194 |
| C10' | 6.714432   | -0.649911 | -0.166841 |
| C11  | -5.421767  | 1.259379  | -0.185668 |
| C11' | 5.420286   | -1.256546 | -0.182985 |
| C12  | -4.265601  | 0.538322  | -0.186210 |
| C12' | 4.264454   | -0.534942 | -0.184880 |
| C13  | -2.930379  | 1.069521  | -0.197172 |
| C13' | 2.929038   | -1.065676 | -0.194765 |
| C14  | -1.879668  | 0.187874  | -0.195072 |
| C14' | 1.878552   | -0.183748 | -0.194535 |
| C15  | -0.487002  | 0.482048  | -0.198286 |
| C15' | 0.485842   | -0.477696 | -0.197228 |
| C16  | -12.000198 | 0.851077  | 2.318698  |

|           |            |           |           |
|-----------|------------|-----------|-----------|
| C16'      | 12.003303  | -0.864703 | 2.313435  |
| C17       | -13.340278 | 1.808252  | 0.440993  |
| C17'      | 13.348907  | -1.806348 | 0.431493  |
| C18       | -10.844336 | -1.490969 | -1.899081 |
| C18'      | 10.846266  | 1.487426  | -1.900865 |
| C19       | -8.110074  | 2.758240  | -0.183815 |
| C19'      | 8.107203   | -2.757266 | -0.179288 |
| C20       | -2.753067  | 2.561658  | -0.208591 |
| C20'      | 2.751229   | -2.557788 | -0.203168 |
| H43(O01)  | -15.536007 | -2.558502 | -0.498339 |
| H44(O02)  | 15.925949  | 1.805554  | 0.651602  |
| H45(C02)  | -13.296916 | -1.341868 | 1.863906  |
| H46(C02)  | -14.568699 | -0.124502 | 1.772436  |
| H47(C02') | 13.282327  | 1.345468  | 1.855790  |
| H48(C02') | 14.553179  | 0.123083  | 1.783420  |
| H49(C03)  | -14.624932 | -0.439845 | -0.718113 |
| H50(C03') | 14.641823  | 0.453577  | -0.719431 |
| H51(C04)  | -12.811778 | -2.811633 | -0.172521 |
| H52(C04)  | -13.337348 | -2.225398 | -1.741102 |
| H53(C04') | 12.819064  | 2.815041  | -0.212811 |
| H54(C04') | 13.357696  | 2.199228  | -1.759580 |
| H55(C07)  | -10.563271 | 1.951319  | -0.032317 |
| H56(C07') | 10.560420  | -1.952570 | -0.029668 |
| H57(C17') | 14.081002  | -2.177972 | 1.159137  |
| H58(C17') | 12.626074  | -2.610835 | 0.258260  |
| H59(C17') | 13.868307  | -1.622569 | -0.514158 |
| H60(C16') | 11.298823  | -1.698473 | 2.232349  |
| H61(C16') | 11.453647  | -0.001234 | 2.703220  |
| H62(C16') | 12.768031  | -1.142516 | 3.049041  |
| H63(C17)  | -13.861143 | 1.631396  | -0.505206 |
| H64(C17)  | -12.614062 | 2.610678  | 0.272152  |
| H65(C17)  | -14.071505 | 2.177805  | 1.169967  |
| H66(C16)  | -12.764105 | 1.128270  | 3.055074  |
| H67(C16)  | -11.454911 | -0.016897 | 2.704711  |
| H68(C16)  | -11.291843 | 1.681924  | 2.241346  |
| H69(C18)  | -11.391613 | -1.750971 | -2.814338 |
| H70(C18)  | -10.309552 | -2.401603 | -1.593788 |
| H71(C18)  | -10.097279 | -0.734450 | -2.146056 |
| H72(C18') | 10.095692  | 0.733493  | -2.144771 |
| H73(C18') | 10.316292  | 2.399775  | -1.592579 |
| H74(C18') | 11.391259  | 1.746308  | -2.817399 |
| H75(C08)  | -9.121140  | 0.435643  | -0.138011 |
| H76(C08') | 8.942102   | 0.638941  | -0.123944 |
| H77(C10)  | -6.717575  | -0.439028 | -0.153722 |

## Supplementary material

|           |           |           |           |           |            |           |           |
|-----------|-----------|-----------|-----------|-----------|------------|-----------|-----------|
| H78(C10') | 6.714432  | -0.649911 | -0.166841 | C10       | -6.860635  | -1.006294 | -0.159418 |
| H79(C19)  | -7.160052 | 3.292926  | -0.226377 | C10'      | 6.535401   | 0.613333  | -0.207542 |
| H80(C19)  | -8.643779 | 3.100553  | 0.711726  | C11       | -5.550838  | -1.575115 | -0.069806 |
| H81(C19)  | -8.707807 | 3.069995  | -1.048894 | C11'      | 5.228573   | 1.187103  | -0.286696 |
| H82(C19') | 8.641163  | -3.098701 | 0.716463  | C12       | -4.413704  | -0.830413 | -0.152272 |
| H83(C19') | 8.704071  | -3.070885 | -1.044289 | C12'      | 4.088984   | 0.443994  | -0.212039 |
| H84(C19') | 7.156685  | -3.291184 | -0.220385 | C13       | -3.065203  | -1.323106 | -0.074107 |
| H85(C11)  | -5.360476 | 2.344738  | -0.196489 | C13'      | 2.741945   | 0.939678  | -0.284539 |
| H86(C11') | 5.358348  | -2.341897 | -0.191733 | C14       | -2.036698  | -0.421909 | -0.174881 |
| H87(C12)  | -4.346476 | -0.549489 | -0.175000 | C14'      | 1.711918   | 0.039257  | -0.188622 |
| H88(C12') | 4.264454  | -0.534942 | -0.184880 | C15       | -0.637083  | -0.678825 | -0.127011 |
| H89(C14)  | -2.133832 | -0.873082 | -0.188350 | C15'      | 0.312661   | 0.297456  | -0.235271 |
| H90(C14') | 2.132958  | 0.877150  | -0.190045 | C16       | -11.175721 | 0.660919  | 1.982673  |
| H91(C15)  | -0.170095 | 1.523714  | -0.199882 | C16'      | 12.489386  | 0.716395  | 0.904152  |
| H92(C15') | 0.168822  | -1.519338 | -0.196635 | C17       | -12.783792 | -1.241441 | 1.958075  |
| H93(C20)  | -3.232766 | 3.004233  | -1.090032 | C17'      | 13.149367  | 1.946575  | 0.253299  |
| H94(C20)  | -3.220719 | 3.016688  | 0.672978  | C18       | -11.098857 | 0.367192  | -2.581642 |
| H95(C20)  | -1.704155 | 2.861071  | -0.218232 | C18'      | 10.698949  | -1.589313 | -1.757756 |
| H96(C20') | 1.702222  | -2.856896 | -0.211997 | C19       | -8.202916  | -3.129331 | 0.108243  |
| H97(C20') | 3.230622  | -3.002249 | -1.083825 | C19'      | 7.884164   | 2.737343  | -0.432924 |
| H98(C20') | 3.218923  | -3.011205 | 0.679212  | C20       | -2.852096  | -2.798567 | 0.113926  |
|           |           |           |           | C20'      | 2.530572   | 2.416820  | -0.461531 |
|           |           |           |           | H43(O01)  | -14.022687 | 3.723382  | -0.522040 |
|           |           |           |           | H44(O02)  | 15.793166  | -1.583149 | 0.785189  |
|           |           |           |           | H46(C02)  | -14.250864 | 0.460026  | 0.393088  |
|           |           |           |           | H47(C02)  | -13.896517 | 1.214908  | 1.948759  |
|           |           |           |           | H48(C03)  | -12.450549 | 2.849631  | 0.891783  |
|           |           |           |           | H49(C17)  | -11.982662 | -1.973481 | 2.109175  |
|           |           |           |           | H50(C17)  | -13.609199 | -1.741001 | 1.436281  |
|           |           |           |           | H51(C17)  | -13.148183 | -0.941027 | 2.947432  |
|           |           |           |           | H52(C16)  | -10.697456 | 1.470024  | 1.420848  |
|           |           |           |           | H53(C16)  | -10.393943 | -0.050435 | 2.262723  |
|           |           |           |           | H54(C16)  | -11.590434 | 1.088093  | 2.903555  |
|           |           |           |           | H55(C02') | 14.393403  | 0.169368  | 1.768569  |
|           |           |           |           | H56(C02') | 13.145424  | -1.064037 | 1.957438  |
|           |           |           |           | H57(C04)  | -12.238118 | 2.622161  | -1.775890 |
|           |           |           |           | H58(C03') | 14.478953  | -0.383709 | -0.694862 |
|           |           |           |           | H59(C07)  | -10.697187 | -2.384357 | 0.000279  |
|           |           |           |           | H60(C04') | 13.223630  | -2.238805 | -1.566901 |
|           |           |           |           | H61(C04') | 12.702586  | -2.722867 | 0.031836  |
|           |           |           |           | H62(C17') | 13.876697  | 2.396320  | 0.940523  |
|           |           |           |           | H63(C17') | 13.669228  | 1.686690  | -0.674055 |
|           |           |           |           | H64(C17') | 12.411218  | 2.718615  | 0.010841  |
|           |           |           |           | H65(C16') | 12.589710  | 1.513327  | 2.923361  |

**Table 5.** LUT Cartesian coordinates.

| Atom | X          | Y         | Z         |
|------|------------|-----------|-----------|
| O01  | -14.266680 | 2.889849  | -0.095269 |
| O02  | 15.049525  | -2.056666 | 0.385980  |
| C01  | -12.286869 | -0.022221 | 1.176362  |
| C01' | 12.489386  | 0.716395  | 0.904152  |
| C02  | -13.459729 | 0.946593  | 0.978930  |
| C02' | 13.559530  | -0.330157 | 1.252893  |
| C03  | -13.059155 | 2.205908  | 0.232985  |
| C03' | 14.065880  | -1.091624 | 0.042218  |
| C04  | -12.282356 | 1.852701  | -1.002678 |
| C04' | 12.913288  | -1.840323 | -0.592768 |
| C05  | -11.711302 | 0.665616  | -1.240878 |
| C05' | 11.657579  | -1.018372 | -0.750127 |
| C06  | -11.787587 | -0.477651 | -0.237568 |
| C06' | 11.439993  | 0.123108  | -0.051468 |
| C07  | -10.536547 | -1.318564 | -0.151641 |
| C07' | 10.214278  | 0.919593  | -0.172818 |
| C08  | -9.273459  | -0.854956 | -0.204054 |
| C08' | 8.944907   | 0.452013  | -0.165159 |
| C09  | -8.063169  | -1.647552 | -0.087072 |
| C09' | 7.742037   | 1.251714  | -0.267573 |

## Supplementary material

|           |            |           |           |           |            |           |           |
|-----------|------------|-----------|-----------|-----------|------------|-----------|-----------|
| H66(C16') | 11.107937  | 1.966414  | 2.066677  | C02'      | 13.145948  | 1.476122  | 0.923004  |
| H67(C16') | 11.295016  | 0.322154  | 2.689208  | C03       | -11.732770 | 3.415886  | 0.110687  |
| H68(C18)  | -10.028824 | 0.147019  | -2.520113 | C03'      | 12.981270  | 2.707007  | 0.055875  |
| H69(C18)  | -11.567917 | -0.521401 | -3.025462 | C04       | -11.428196 | 2.846930  | -1.268615 |
| H70(C18)  | -11.241440 | 1.203682  | -3.272295 | C04'      | 12.450550  | 2.289034  | -1.308801 |
| H71(C08)  | -9.121215  | 0.215918  | -0.346773 | C05       | -10.572646 | 1.601684  | -1.213618 |
| H72(C07') | 10.355942  | 1.999977  | -0.209358 | C05'      | 11.178934  | 1.476245  | -1.219290 |
| H73(C18') | 11.245347  | -1.918974 | -2.650426 | C06       | -10.568878 | 0.753580  | 0.019401  |
| H74(C18') | 9.932858   | -0.874824 | -2.064083 | C06'      | 10.870205  | 0.707936  | 0.027601  |
| H75(C18') | 10.188167  | -2.480267 | -1.365886 | C07       | -10.154180 | -0.673288 | -0.065639 |
| H76(C08') | 8.788500   | -0.619502 | -0.048354 | C07'      | 9.931051   | -0.445174 | -0.028502 |
| H77(C19)  | -7.240500  | -3.638192 | 0.179139  | C08       | -8.867439  | -1.068203 | -0.095613 |
| H78(C19)  | -8.759115  | -3.581004 | -0.722420 | C08'      | 8.591382   | -0.309717 | -0.035487 |
| H79(C19)  | -8.765317  | -3.350305 | 1.023965  | C09       | -8.410157  | -2.443203 | -0.157892 |
| H80(C10)  | -6.889694  | 0.075059  | -0.302153 | C09'      | 7.622480   | -1.388306 | -0.074219 |
| H81(C19') | 8.471751   | 2.975770  | -1.327754 | C10       | -7.084729  | -2.770977 | -0.174205 |
| H82(C19') | 6.922685   | 3.245315  | -0.521252 | C10'      | 6.297408   | -1.061962 | -0.071017 |
| H83(C19') | 8.413857   | 3.176394  | 0.421887  | C11       | -5.956160  | -1.888875 | -0.136691 |
| H84(C10') | 6.561187   | -0.470463 | -0.084508 | C11'      | 5.171500   | -1.944213 | -0.105409 |
| H85(C11)  | -5.463122  | -2.649636 | 0.069961  | C12       | -4.671825  | -2.337944 | -0.155444 |
| H86(C11') | 5.143260   | 2.263635  | -0.412133 | C12'      | 3.884780   | -1.498686 | -0.096499 |
| H87(C12)  | -4.521122  | 0.246244  | -0.291211 | C13       | -3.484832  | -1.525672 | -0.119336 |
| H88(C12') | 4.194451   | -0.634264 | -0.084771 | C13'      | 2.700151   | -2.313064 | -0.131032 |
| H89(C14)  | -2.316228  | 0.624163  | -0.308552 | C14       | -2.267199  | -2.154566 | -0.143312 |
| H90(C14') | 1.990313   | -1.007799 | -0.060570 | C14'      | 1.480932   | -1.686527 | -0.112980 |
| H91(C15)  | -0.295680  | -1.704577 | 0.002343  | C15       | -0.972750  | -1.560936 | -0.115782 |
| H92(C15') | -0.028321  | 1.323477  | -0.363860 | C15'      | 0.187272   | -2.281579 | -0.140491 |
| H93(C20)  | -1.796338  | -3.069332 | 0.158268  | C16       | -10.475300 | 1.430769  | 2.408072  |
| H94(C20)  | -3.306545  | -3.365796 | -0.707442 | C16'      | 11.098284  | 1.390538  | 2.405771  |
| H95(C20)  | -3.323222  | -3.145229 | 1.041740  | C17       | -12.343097 | -0.041674 | 1.664580  |
| H96(C20') | 2.984774   | 2.977122  | 0.364712  | C17'      | 12.228680  | -0.700276 | 1.657695  |
| H97(C20') | 3.002963   | 2.770161  | -1.386134 | C18       | -10.192051 | 1.042906  | -2.560002 |
| H98(C20') | 1.475092   | 2.688991  | -0.504436 | C18'      | 10.582464  | 1.097958  | -2.550062 |
|           |            |           |           | C19       | -9.442212  | -3.534543 | -0.200886 |
|           |            |           |           | C19'      | 8.131587   | -2.799901 | -0.113183 |
|           |            |           |           | C20       | -3.641543  | -0.032811 | -0.056137 |
|           |            |           |           | C20'      | 2.859013   | -3.806203 | -0.184852 |
|           |            |           |           | H45(O01)  | -12.281357 | 5.184529  | -0.483380 |
|           |            |           |           | H46(O01') | 14.162797  | 4.115785  | -0.577158 |
|           |            |           |           | H47(C04)  | -10.912320 | 3.595338  | -1.889255 |
|           |            |           |           | H48(C04)  | -12.379534 | 2.621039  | -1.768231 |
|           |            |           |           | H49(C04') | 12.254043  | 3.173688  | -1.933546 |
|           |            |           |           | H50(C04') | 13.228272  | 1.705795  | -1.819411 |
|           |            |           |           | H51(C07)  | -10.956077 | -1.406692 | -0.085412 |

**Table 6.** VIO Cartesian coordinates.

| Atom | X          | Y        | Z         |
|------|------------|----------|-----------|
| O01  | -12.679680 | 4.472756 | 0.037420  |
| O01' | 14.263388  | 3.310772 | -0.049565 |
| O02  | -9.507657  | 1.683256 | -0.254520 |
| O02' | 10.250347  | 1.975360 | -0.245431 |
| C01  | -11.435550 | 1.124849 | 1.250225  |
| C01' | 11.838811  | 0.723772 | 1.238256  |
| C02  | -12.350702 | 2.332184 | 0.969588  |

## Supplementary material

|           |            |           |           |
|-----------|------------|-----------|-----------|
| H52(C07') | 10.383489  | -1.433333 | -0.049173 |
| H53(C02)  | -12.674923 | 2.768135  | 1.922124  |
| H54(C02)  | -13.261244 | 1.994285  | 0.454876  |
| H55(C02') | 13.634693  | 1.759906  | 1.862782  |
| H56(C02') | 13.841712  | 0.805178  | 0.399547  |
| H57(C03)  | -10.799041 | 3.771889  | 0.569008  |
| H58(C03') | 12.269683  | 3.403047  | 0.522495  |
| H59(C18)  | -9.601456  | 1.781351  | -3.114252 |
| H60(C18)  | -9.602684  | 0.129745  | -2.462162 |
| H61(C18)  | -11.088808 | 0.821772  | -3.149800 |
| H62(C18') | 10.313407  | 2.003205  | -3.106354 |
| H63(C18') | 11.309837  | 0.540352  | -3.150929 |
| H64(C18') | 9.686773   | 0.486877  | -2.427229 |
| H65(C17)  | -13.006266 | 0.284285  | 2.473693  |
| H66(C17)  | -11.768208 | -0.897963 | 2.031119  |
| H67(C17)  | -12.977484 | -0.378909 | 0.836012  |
| H68(C16)  | -11.040219 | 1.628199  | 3.326181  |
| H69(C16)  | -9.850835  | 2.301138  | 2.189598  |
| H70(C16)  | -9.809735  | 0.580506  | 2.594161  |
| H71(C16') | 10.857342  | 2.433247  | 2.182396  |
| H72(C16') | 11.714710  | 1.360893  | 3.311455  |
| H73(C16') | 10.158182  | 0.868596  | 2.616272  |
| H74(C17') | 12.983406  | -0.651498 | 2.450657  |
| H75(C17') | 11.373088  | -1.260822 | 2.047245  |
| H76(C17') | 12.663576  | -1.265803 | 0.824773  |
| H77(C08)  | -8.118692  | -0.280772 | -0.074849 |
| H78(C08') | 8.192679   | 0.703589  | -0.015369 |
| H79(C10)  | -6.840032  | -3.832863 | -0.219488 |
| H80(C10') | 6.056023   | 0.001388  | -0.038668 |
| H81(C19)  | -10.099130 | -3.430384 | -1.074066 |
| H82(C19)  | -10.088598 | -3.508713 | 0.685992  |
| H83(C19)  | -8.975238  | -4.521970 | -0.247322 |
| H84(C19') | 8.751408   | -3.014577 | 0.766383  |
| H85(C19') | 7.328914   | -3.538412 | -0.140799 |
| H86(C19') | 8.764509   | -2.962191 | -0.994569 |
| H87(C11)  | -6.136306  | -0.818116 | -0.090148 |
| H88(C11') | 5.354796   | -3.015230 | -0.140826 |
| H89(C12)  | -4.511217  | -3.416050 | -0.201523 |
| H90(C12') | 3.721791   | -0.420726 | -0.059780 |
| H91(C14)  | -2.281312  | -3.244528 | -0.188520 |
| H92(C14') | 1.493412   | -0.596407 | -0.072161 |
| H93(C20)  | -2.684745  | 0.490620  | -0.034410 |
| H94(C20)  | -4.202630  | 0.262499  | 0.838672  |
| H95(C20)  | -4.203742  | 0.337215  | -0.921990 |

|            |           |           |           |
|------------|-----------|-----------|-----------|
| H96(C20')  | 3.416142  | -4.170467 | 0.686855  |
| H97(C20')  | 1.902874  | -4.330787 | -0.208793 |
| H98(C20')  | 3.425208  | -4.106011 | -1.075062 |
| H99(C15)   | -0.893953 | -0.475903 | -0.072308 |
| H100(C15') | 0.108914  | -3.366715 | -0.183134 |

**Table 7.** 9NEO Cartesian coordinates.

| Atom | X          | Y         | Z         |
|------|------------|-----------|-----------|
| O01  | -11.186779 | -4.860248 | 0.060083  |
| O01' | 12.530945  | -2.598575 | -0.499931 |
| O02  | -7.871158  | -2.367914 | 1.194122  |
| O02' | 8.456565   | -1.815309 | -0.179568 |
| C18' | 9.075509   | -1.239131 | -2.514718 |
| C06' | 9.563872   | -0.932464 | 0.039454  |
| C01  | -9.563043  | -1.752813 | -1.320732 |
| C01' | 10.445152  | -1.324149 | 1.239993  |
| C02  | -10.518815 | -2.949810 | -1.149904 |
| C02' | 10.834229  | -2.813956 | 1.164186  |
| C03  | -10.196565 | -3.840366 | 0.035549  |
| C03' | 11.331703  | -3.296919 | -0.186486 |
| C04  | -10.208686 | -3.021716 | 1.320367  |
| C04' | 10.266437  | -3.101052 | -1.262812 |
| C05  | -9.209341  | -1.856184 | 1.294798  |
| C05' | 9.492893   | -1.797100 | -1.177927 |
| C06  | -9.433335  | -1.023195 | 0.026632  |
| C07  | 9.236776   | 0.515953  | -0.063143 |
| C07  | -9.509905  | 0.279641  | 0.114353  |
| C08  | -9.576095  | 1.592858  | 0.206177  |
| C08' | 7.978115   | 0.992515  | -0.083179 |
| C09  | -8.448932  | 2.530571  | 0.132697  |
| C09' | 7.610310   | 2.393232  | -0.163354 |
| C10  | -7.163520  | 2.084508  | 0.128908  |
| C10' | 6.309410   | 2.807929  | -0.169534 |
| C11  | -5.970195  | 2.870337  | 0.048365  |
| C11' | 5.124813   | 2.004586  | -0.100908 |
| C12  | -4.722522  | 2.325246  | 0.059589  |
| C12' | 3.873495   | 2.539068  | -0.115349 |
| C13  | -3.478925  | 3.043940  | -0.016060 |
| C13' | 2.634061   | 1.811737  | -0.047666 |
| C14  | -2.309994  | 2.328151  | 0.008814  |
| C14' | 1.462292   | 2.522245  | -0.073865 |
| C15  | -0.976041  | 2.823874  | -0.049800 |
| C15' | 0.129571   | 2.022498  | -0.017292 |

## Supplementary material

|           |            |           |           |           |            |           |           |
|-----------|------------|-----------|-----------|-----------|------------|-----------|-----------|
| C16       | -8.178543  | -2.223268 | -1.803267 | H80(C18)  | -9.145430  | -1.667711 | 3.442425  |
| C16'      | 9.618046   | -1.123275 | 2.517753  | H81(C12') | 3.786191   | 3.624473  | -0.183710 |
| C17       | -10.147646 | -0.822546 | -2.386613 | H83(O01)  | -10.965462 | -5.464514 | 0.782768  |
| C17'      | 11.694169  | -0.432154 | 1.312662  | H84(C08)  | -10.561105 | 2.042581  | 0.347865  |
| C18       | -9.327640  | -1.027674 | 2.569398  | H85(C20') | 1.697958   | -0.141541 | 0.094556  |
| C19       | -8.843578  | 3.978619  | 0.070621  | H86(C20') | 3.211771   | -0.114486 | -0.814607 |
| C19'      | 8.711364   | 3.413179  | -0.238400 | H87(C20') | 3.240240   | 0.000054  | 0.943569  |
| C20       | -3.523991  | 4.542627  | -0.117348 | H88(C14') | 1.551565   | 3.607262  | -0.146262 |
| C20'      | 2.688442   | 0.313385  | 0.049043  | H89(C19)  | -9.498878  | 4.236600  | 0.912643  |
| H45(C04') | 10.736953  | -3.185102 | -2.251835 | H90(C19)  | -7.988659  | 4.656235  | 0.096952  |
| H46(C04') | 9.531899   | -3.915058 | -1.202964 | H91(C19)  | -9.411217  | 4.190480  | -0.844971 |
| H47(C02') | 11.600415  | -3.014950 | 1.922209  | H92(C10)  | -7.017940  | 1.005460  | 0.196056  |
| H48(C02') | 9.958554   | -3.421889 | 1.421118  | H93(C15') | -0.025562  | 0.947333  | 0.056382  |
| H49(C03') | 11.549620  | -4.374685 | -0.106624 | H94(C11)  | -6.067992  | 3.950730  | -0.027313 |
| H50(C18') | 8.489678   | -1.986833 | -3.062641 | H95(C15)  | -0.818746  | 3.898811  | -0.123777 |
| H51(C18') | 9.956797   | -0.995974 | -3.119146 | H96(C12)  | -4.644193  | 1.239821  | 0.132446  |
| H52(C18') | 8.470639   | -0.338456 | -2.401671 | H97(C14)  | -2.403776  | 1.243807  | 0.083455  |
| H53(C07') | 10.085239  | 1.194143  | -0.104187 | H98(C20)  | -2.531134  | 4.991698  | -0.167872 |
| H54(C17') | 12.259382  | -0.449391 | 0.378861  | H99(C20)  | -4.076443  | 4.856107  | -1.011508 |
| H55(C17') | 12.358519  | -0.793904 | 2.105183  | H100(C20) | -4.041556  | 4.976288  | 0.746990  |
| H56(C17') | 11.428101  | 0.601315  | 1.558572  |           |            |           |           |
| H57(C16') | 10.192271  | -1.442760 | 3.395458  |           |            |           |           |
| H58(C16') | 8.693916   | -1.709442 | 2.480124  |           |            |           |           |
| H59(C16') | 9.347922   | -0.070960 | 2.654123  |           |            |           |           |
| H60(O01') | 12.856476  | -2.944332 | -1.342955 |           |            |           |           |
| H61(C08') | 7.179752   | 0.256079  | -0.038788 |           |            |           |           |
| H62(C19') | 8.309769   | 4.428391  | -0.296740 |           |            |           |           |
| H63(C19') | 9.348504   | 3.250753  | -1.117330 |           |            |           |           |
| H64(C19') | 9.366483   | 3.359489  | 0.640785  |           |            |           |           |
| H65(C10') | 6.135238   | 3.882831  | -0.232130 |           |            |           |           |
| H66(C11') | 5.233349   | 0.925312  | -0.032769 |           |            |           |           |
| H67(C02)  | -10.515757 | -3.552860 | -2.066212 |           |            |           |           |
| H68(C02)  | -11.545500 | -2.582048 | -1.015441 |           |            |           |           |
| H69(C03)  | -9.199002  | -4.284934 | -0.096371 |           |            |           |           |
| H70(C04)  | -9.978315  | -3.663112 | 2.186316  |           |            |           |           |
| H71(C04)  | -11.224513 | -2.635240 | 1.473604  |           |            |           |           |
| H72(C16)  | -8.282098  | -2.765737 | -2.751224 |           |            |           |           |
| H73(C16)  | -7.527536  | -1.359671 | -1.975400 |           |            |           |           |
| H74(C16)  | -7.683887  | -2.868339 | -1.075839 |           |            |           |           |
| H75(C17)  | -10.257793 | -1.364447 | -3.332891 |           |            |           |           |
| H76(C17)  | -11.133108 | -0.446030 | -2.092116 |           |            |           |           |
| H77(C17)  | -9.495594  | 0.038736  | -2.563081 |           |            |           |           |
| H78(C18)  | -10.324648 | -0.591062 | 2.676779  |           |            |           |           |
| H79(C18)  | -8.591043  | -0.220225 | 2.571925  |           |            |           |           |

**Table 8.** NEO Cartesian coordinates.

| Atom | X          | Y         | Z         |
|------|------------|-----------|-----------|
| O01  | 13.807685  | -2.293649 | 0.447959  |
| O01' | -13.230447 | -2.426125 | -0.761408 |
| O02  | 9.807461   | -2.171010 | -1.126473 |
| O02' | -10.906033 | 0.968589  | -0.114728 |
| C01  | 10.571114  | -0.651109 | 1.460017  |
| C01' | -11.344618 | -1.118065 | 1.175698  |
| C02  | 12.049033  | -1.087688 | 1.454057  |
| C02' | -12.856180 | -0.867176 | 1.006429  |
| C03  | 12.417761  | -2.024327 | 0.318849  |
| C03' | -13.403999 | -1.061943 | -0.396094 |
| C04  | 12.099716  | -1.369739 | -1.019465 |
| C04' | -12.721273 | -0.120504 | -1.385935 |
| C05  | 10.619374  | -0.986622 | -1.160224 |
| C05' | -11.227195 | 0.061198  | -1.184002 |
| C06  | 10.191318  | -0.154468 | 0.054979  |
| C06' | -10.550301 | -0.407946 | 0.063899  |
| C07  | 9.513612   | 0.949818  | -0.124096 |
| C07' | -9.087068  | -0.679470 | 0.055485  |
| C08  | 8.818843   | 2.055237  | -0.305352 |
| C08' | -8.152370  | 0.285629  | 0.141777  |
| C09  | 7.356713   | 2.161418  | -0.381756 |



## Supplementary material

|           |            |           |           |           |           |           |           |
|-----------|------------|-----------|-----------|-----------|-----------|-----------|-----------|
| C09'      | -6.716055  | 0.086098  | 0.162010  | H66(C11') | -3.936938 | 0.298841  | 0.264529  |
| C10       | 6.575136   | 1.048934  | -0.442275 | H67(C02)  | 12.291762 | -1.566373 | 2.410710  |
| C10'      | -5.914970  | 1.187346  | 0.256434  | H68(C02)  | 12.692559 | -0.200920 | 1.370745  |
| C11       | 5.147006   | 0.992542  | -0.499456 | H69(C03)  | 11.841890 | -2.957465 | 0.407316  |
| C11'      | -4.486403  | 1.236765  | 0.299668  | H70(C04)  | 12.368689 | -2.042619 | -1.849664 |
| C12       | 4.456678   | -0.177746 | -0.572603 | H71(C04)  | 12.725432 | -0.473858 | -1.122513 |
| C12'      | -3.792980  | 2.403352  | 0.402072  | H72(C16)  | 9.951617  | -2.190056 | 2.860738  |
| C13       | 3.021349   | -0.359211 | -0.612176 | H73(C16)  | 8.617553  | -1.480908 | 1.930253  |
| C13'      | -2.358373  | 2.587292  | 0.439268  | H74(C16)  | 9.693754  | -2.644501 | 1.157078  |
| C14       | 2.152665   | 0.634346  | -0.249288 | H75(C17)  | 10.705926 | 0.104450  | 3.483103  |
| C14'      | -1.488674  | 1.597027  | 0.069698  | H76(C17)  | 11.028421 | 1.334333  | 2.245164  |
| C15       | 0.729344   | 0.599529  | -0.294155 | H77(C17)  | 9.367149  | 0.802027  | 2.553960  |
| C15'      | -0.065467  | 1.633926  | 0.112765  | H78(C18)  | 10.959439 | 0.665590  | -2.541705 |
| C16       | 9.657051   | -1.820273 | 1.870738  | H79(C18)  | 9.323101  | -0.021927 | -2.602111 |
| C16'      | -11.034737 | -2.622866 | 1.190090  | H80(C18)  | 10.691551 | -0.905175 | -3.314348 |
| C17       | 10.407330  | 0.466833  | 2.492802  | H81(C12') | -4.382290 | 3.317562  | 0.492640  |
| C17'      | -10.920231 | -0.511335 | 2.520590  | H83(O01)  | 14.047117 | -2.929571 | -0.240997 |
| C18       | 10.382500  | -0.261570 | -2.480543 | H84(C08)  | 9.370799  | 2.992183  | -0.404866 |
| C18'      | -10.455507 | 0.285663  | -2.459409 | H85(C20') | -0.850309 | 4.142565  | 0.674143  |
| C19       | 6.831223   | 3.568489  | -0.387793 | H86(C20') | -2.498294 | 4.732593  | 0.449187  |
| C19'      | -6.193579  | -1.318727 | 0.080245  | H87(C20') | -2.020156 | 4.044438  | 1.997334  |
| C20       | 2.559870   | -1.716211 | -1.074139 | H88(C14') | -1.916984 | 0.670367  | -0.311722 |
| C20'      | -1.896664  | 3.940992  | 0.911349  | H89(C19)  | 7.298315  | 4.150771  | -1.192541 |
| H45(C04') | -12.913327 | -0.475044 | -2.407729 | H90(C19)  | 5.750199  | 3.620803  | -0.526550 |
| H46(C04') | -13.177442 | 0.875960  | -1.316816 | H91(C19)  | 7.074420  | 4.081039  | 0.552184  |
| H47(C02') | -13.399702 | -1.521471 | 1.698210  | H92(C10)  | 7.089266  | 0.086815  | -0.447311 |
| H48(C02') | -13.077459 | 0.166432  | 1.298047  | H93(C15') | 0.423406  | 2.527893  | 0.496740  |
| H49(C03') | -14.480700 | -0.825485 | -0.379514 | H94(C11)  | 4.593379  | 1.929043  | -0.495591 |
| H50(C18') | -10.867603 | 1.148755  | -2.995841 | H95(C15)  | 0.239812  | -0.294573 | -0.677193 |
| H51(C18') | -10.539886 | -0.587909 | -3.115855 | H96(C12)  | 5.046664  | -1.093733 | -0.633331 |
| H52(C18') | -9.399285  | 0.472045  | -2.260620 | H97(C14)  | 2.582283  | 1.560834  | 0.130983  |
| H53(C07') | -8.795968  | -1.725069 | -0.005369 | H98(C20)  | 1.507809  | -1.908692 | -0.855667 |
| H54(C17') | -11.211441 | -3.082174 | 0.215636  | H99(C20)  | 2.705823  | -1.835530 | -2.155669 |
| H55(C17') | -11.686861 | -3.125598 | 1.912811  | H100(C20) | 3.147912  | -2.504182 | -0.588706 |
| H56(C17') | -10.001230 | -2.811043 | 1.499644  |           |           |           |           |
| H57(C16') | -11.504676 | -0.951845 | 3.337045  |           |           |           |           |
| H58(C16') | -11.081939 | 0.571639  | 2.527953  |           |           |           |           |
| H59(C16') | -9.860476  | -0.697918 | 2.723088  |           |           |           |           |
| H60(O01') | -13.619164 | -2.542944 | -1.639728 |           |           |           |           |
| H61(C08') | -8.502622  | 1.315428  | 0.201139  |           |           |           |           |
| H62(C19') | -5.103857  | -1.367258 | 0.103464  |           |           |           |           |
| H63(C19') | -6.529883  | -1.806382 | -0.843267 |           |           |           |           |
| H64(C19') | -6.571982  | -1.923284 | 0.913950  |           |           |           |           |
| H65(C10') | -6.417229  | 2.154410  | 0.307717  |           |           |           |           |

## Supplementary material

### 1. Chemical reactivity indexes.

2.1 Electronegativity ( $\chi$ ). It is equivalent to the chemical potential ( $\mu$ ) negative value. It is calculated starting with the ionization potential ( $I$ ) and electronic affinity ( $A$ ) with the next working equation [36]:

$$\chi = \frac{I+A}{2} = -\mu \quad (5)$$

As we will see when talking about the electrophilicity index, electronegativity is conceived as a kind of driving force that favors electronic transfer.

2.2 Hardness ( $\eta$ ). It is converse to the softness ( $S$ ), this value may be calculated using the following working equation [37]:

$$\eta = \frac{I-A}{2} = \frac{1}{S} \quad (6)$$

2.3 Electrophilicity index ( $\omega$ ). It is defined as energy released by an acceptor molecule once it gets saturated with electrons, the working equation to calculate this index is:

$$\omega = \frac{\chi^2}{2\eta} \quad (7)$$

This last equation is analogous to the equation used in basic electricity to relate electric power ( $W$ ) with voltage ( $V$ ) and resistance ( $R$ ):

$$W = \frac{V^2}{R} \quad (8)$$

An important characteristic of this property is that it is well described in gas phase, when the donor and acceptor molecules are close enough for electronic transfer, since solvent molecules have been removed and are irrelevant [38].

2.4 Electrodonor power ( $\omega^-$ ) and electroacceptor power ( $\omega^+$ ). The next working equations are used to calculate these values [39]:

$$\omega^- = \frac{(3I+A)^2}{16(I-A)} \quad (9)$$

$$\omega^+ = \frac{(I+3A)^2}{16(I-A)} \quad (10)$$

In order to compare  $\omega^+$  with  $\omega^-$  the following working equation for net electrophilicity has been proposed [40]:

$$\Delta\omega^\pm = \omega^+ - (-\omega^-) = \omega^+ + \omega^- \quad (11)$$

2.5 Condensed Fukui functions. They play a crucial role in the relationship between frontier molecular orbital theory and the principles for acids and basis (soft and hard) [41]. Condensed Fukui functions are based in the concept of integrate them in atomic regions, this procedure is like that used on the techniques to analyze populations [42]; when such integration is combined with the finite difference approximation the next equations can be obtained:

$$f_k^+ = q_k(N+1) - q_k(N) \quad (12)$$

$$f_k^- = q_k(N) - q_k(N-1) \quad (13)$$

$$f_k^0 = \frac{q_k(N+1) + q_k(N-1)}{2} \quad (14)$$

Where  $f_k^+$ ,  $f_k^-$  and  $f_k^0$  are condensed Fukui function values for atoms subject to a nucleophilic attack, an electrophilic attack and a radical attack, respectively.  $q_k(N)$  denotes the electronic population of atom  $k$  of the neutral molecule,  $q_k(N+1)$  denotes the electronic population of atom  $k$  of the anion and  $q_k(N-1)$  denotes the electronic population of atom  $k$  of the cation. In the literature, negative values have been reported when using equations (12), (13) y (14), It is unknown if these negative values have physical interpretation. The presence of these negative values has been attributed to relaxation effects and to inadequate charge partition techniques [43]. Atomic population value is sensitive to partition scheme, in this work, Hirshfeld partition technique was used because it is considered superior to other options despite of getting a few negative values [44].

2.6 Condensed dual descriptor. It is another local reactivity descriptor ( $f^{(2)}(r)$ ). This descriptor possesses the capability to locate atoms prone to nucleophilic and electrophilic attacks more efficiently than condensed Fukui functions and

## Supplementary material

with less ambiguity. The following working equation is as shown next [45]:

$$f^{(2)}(r) = f_{(k)}^+ - f_{(k)}^- \quad (15)$$

2.7 Condensed local softness. Condensed Fukui function values can be compared only within the same molecule. However, when the condensed Fukui function value is multiplied by the global molecular softness ( $S$ ) one can obtain the condensed local softness (e.g.  $s_{(k)}^+$ ) and the values obtained in this manner permit us to compare atom susceptibility in different molecules to nucleophilic, electrophilic, and radical attacks [46]. The next working equations to calculate these values are:

$$\begin{aligned} s_{(k)}^+ \\ = f_{(k)}^+ \text{ multiplied by } S \end{aligned} \quad (16)$$

$$\begin{aligned} s_{(k)}^- \\ = f_{(k)}^- \text{ multiplied by } S \end{aligned} \quad (17)$$

$$\begin{aligned} s_{(k)}^0 \\ = f_{(k)}^0 \text{ multiplied by } S \end{aligned} \quad (18)$$

2.8 Intramolecular reorganization energy. It is defined as the sum of two identical energies, the first one is the required energy to pass from neutral molecule Geometry to ionized molecule Geometry (as a cation due to the loss of charge or as anion due to the acceptance of charge). The second energy is the inverse process, the relaxation of an ion Geometry to neutral molecule; all of this governed by charge transfer process principles.

Intramolecular reorganization energy is obtained through 2 terms that come from structural relaxing energies in their neutral and charged forms. Total adiabatic reorganization energy can be calculated with a working equation (19), which in turn may be calculated with the following working equations (16) and (17):

$$\lambda_{tot} = \lambda_N + \lambda_C \quad (19)$$

$$\lambda_N = E_N(rel) - E_N \quad (20)$$

$$\lambda_C = E_C - E_C(rel) \quad (21)$$

Where  $\lambda_N$  is the neutral molecular reorganization energy,  $E_N(rel)$  is the molecular neutral energy acquired from an anion or cation optimized molecular Geometry,  $E_N$  is the neutral molecular energy obtained from a neutral molecular Geometry,  $\lambda_C$  is the reorganization energy of the molecule in charged state (anion or cation) acquired from an optimized Geometry of the charged molecule,  $E_C$  is the charged molecular energy obtained from an optimized Geometry of a neutral molecule and  $E_C(rel)$  is the charged molecule energy (cation or anion) acquired from an optimized Geometry of a molecule in its anionic or cationic state.

2.9 Electron and hole extraction potentials. Reorganization energies are related with the hole and electron extraction potentials with the next working equations (22) and (23).

$$HEP = IP - \lambda_h \quad (22)$$

$$EEP = EA + \lambda_e \quad (23)$$

Where  $HEP$  is the hole extraction potential,  $EEP$  is the electron extraction potential,  $\lambda_h$  is the hole reorganization energy and  $\lambda_e$  is the electron reorganization energy.  $\lambda_h$  and  $\lambda_e$  correspond to cationic  $\lambda_{tot}$  and anionic  $\lambda_{tot}$ , respectively.

## 2. REFERENCES.

- [36] R. S. Mulliken. A New Electroaffinity Scale; Together with Data on Valence States and on Valence Ionization Potentials and Electron Affinities, *J Chem Phys*, vol. 2, pp 782–793, 1934.
- [37] R. G. Parr & R. G. Pearson. Absolute Hardness: Companion Parameter to Absolute Electronegativity, *J Am Chem Soc* vol. 105, no. 26, pp 7512–7516, 1983.
- [38] R. G. Parr, L. V. Szentpály & S. Liu. Electrophilicity index, *J Am Chem Soc* vol. 121, no. 9, pp 1922–1924, 1999.
- [39] J. L. Gázquez, A. Cedillo & A. Vela, Electrodonating and electroaccepting powers, *J Phys Chem A* vol. 111, no. 10, pp 1966–1970, 2007.
- [40] P. K. Chattaraj, A. Chakraborty & S. Giri. Net electrophilicity, *J Phys Chem A* vol. 113, no. 37, pp 10068–10074, 2009.
- [41] Y. Li & J. N. S. Evans. The Fukui Function: A Key Concept Linking Frontier Molecular Orbital Theory and the Hard-Soft-Acid-Base Principle, *J Am Chem Soc* vol. 117, no. 29, pp 7756–7759, 1995.
- [42] S. M. Bachrach. Population Analysis and Electron Densities from Quantum Mechanics. In: K. B. Lipkowitz & D. B. Boyd (eds), *Reviews in Computational Chemistry*, vol V. VCH, New York, pp 171–228, 1995.
- [43] R. K. Roy, S. Pal & K. J. Hirao. On non-negativity of Fukui function indices, *Chem Phys* vol. 110, pp 8236, 1999.
- [44] E. N. Maslen & M. Spackman. Atomic charges and electron density partitioning, *Aust J Phys* vol. 38, pp 273–287, 1985.
- [45] J. I. Martínez-Araya. Why is the dual descriptor a more accurate local reactivity descriptor than Fukui functions? *J. Math. Chem.* vol. 53, pp 451–465, 2014.
- [46] P. Geerlings, F. De Proft & W. Langenaeker. Conceptual Density Functional Theory, *Chem Rev* vol. 103, no. 5, pp 1793–1874, 2003.
